# Supplementary material for: Recognition, detection and host–guest chemistry of hydrogen peroxide in a fluorescent metal–organic framework with chiral helical channels
Source: Royal Society of Chemistry journal article supplement (doi:10.1039/d3qi01092a), 2023-01-01
Supplement: d3qi01092a1.pdf [file d3qi01092a1.pdf]

*Electronic Supplementary Information*

**Recognition, Detection and Host-Guest Chemistry of Hydrogen  
Peroxide in a Fluorescent Biological Metal-Organic Framework with  
Chiral Helical Channels**

Hong Cai,<sup>\*a</sup> Jie-Wen Wu,<sup>a</sup> Xiao-Jun Cai,<sup>a</sup> Zhou Lu,<sup>b</sup> Ya-Liang Lai,<sup>c</sup> Jing-Xuan Sun,<sup>d</sup> Zhuo-Li Yuan,<sup>a</sup> Yang-Ying Huang,<sup>a</sup>  
Jing-Wen Cai,<sup>a</sup> Wen Lu,<sup>a</sup> Yi-Hong Lu,<sup>a</sup> Hui-Ying Zhang<sup>a</sup> and Dan Li<sup>\*c</sup>

<sup>a</sup> School of Chemistry and Environmental Engineering, Hanshan Normal University, Chaozhou 521041, P. R. China.  
Email: tiddychen@163.com

<sup>b</sup> Department of Chemistry, University of Rochester, Rochester, New York 14627, United States.

<sup>c</sup> College of Chemistry and Materials Science, Guangdong Provincial Key Laboratory of Functional Supramolecular  
Coordination Materials and Applications, Jinan University, Guangzhou 510632, P. R. China. Email: danli@jnu.edu.cn

<sup>d</sup> College of Chemistry & Chemical Engineering, Shantou University, Shantou 515063, P. R. China.

**Materials and Methods**

All chemicals were purchased from commercial sources and used without further purification. The organic solutions were purchased from Xilong Science Co., Ltd. and Guangdong Guanghua Technology Co., Ltd. Single crystal X-ray diffraction (SCXRD) analysis was performed by a Rigaku XtaLAB PRO MM007-DW diffractometer system, RA-Micro7HF-MR-DW(Cu/Mo) X-ray generator and a Pilatus 3R-200K-A detector (Cu K $\alpha$ ,  $\lambda$  = 1.54178 Å). PXRD patterns of the bulk samples were measured on a Rigaku MiniFlex600 X-ray diffractometer (Rigaku, Kyoto, Japan). ITC experiments were tested on Malvern MicroCal VP-ITC System (Malvern, Europe). Elemental analyses of C, H, and N were carried out on a PerkinElmer PE 2400II. pH was confirmed by PHS-3C pH meter. Thermogravimetric analyses (TGA) were performed using a Shimadzu synchronous differential thermal-thermogravimetric analyzer (DTG-60) in the temperature range of room temperature – 800 °C under nitrogen flow (40 mL · min<sup>-1</sup>) at a typical heating rate of 10 °C/min. Infrared spectra (IR) were collected in KBr disks using a Shimadzu IRAffinity-1 in the range of 4000-400 cm<sup>-1</sup>. Solid state and solution luminescence spectra were measured on a PF-5301PC. UV-Vis spectra and ultraviolet titrating experiments were recorded on an TU-1950 ultraviolet and visible spectrophotometer (Persee, Beijing, China). Circular dichroism (CD) spectra were measured on a Chirascan V100 (Applied Photophysics Ltd,UK) in the range of 200-500 nm (Equipped with PMT detector).

**Synthesis of HSTC-1:**

A mixture of Zn(CH<sub>3</sub>COO)<sub>2</sub>·2H<sub>2</sub>O (0.12 mmol), purine (0.04 mmol), and acetonitrile (5 mL) was sealed in a Pyrex glass tube with the pH adjusted by 50  $\mu$ L 28% NH<sub>3</sub> aqueous solution, and heated in an oven at 120 °C for 72 h. After cooling to room temperature at rates of 5 °C/h, the colourless crystals were obtained by filtration and washed with acetonitrile 3 times. Selected suitable crystals were immediately mounted on single crystal X-ray diffractometer for structural determination. IR spectrum (see Fig. S4a). Elemental analysis (CHN), C<sub>7</sub>H<sub>6</sub>N<sub>4</sub>O<sub>2</sub>Zn(H<sub>2</sub>O)<sub>1.2</sub>, calculated (%): C, 31.7076; H, 3.1931; N, 21.1298. found (%): C, 31.19; H, 3.116; N, 21.47.

### Synthesis of HSTC-2:

A mixture of  $\text{Zn}(\text{CH}_3\text{COO})_2 \cdot 2\text{H}_2\text{O}$  (0.12 mmol), purine (0.04 mmol), and acetonitrile (5 ml) was sealed in a Pyrex glass tube with the pH adjusted by 400  $\mu\text{L}$  1M  $\text{HNO}_3$ , and heated in an oven at 120 °C for 72 h. After cooling to room temperature at rates of 5°C/h, the yellowish crystals were obtained by filtration and washed with acetonitrile 3 times. Selected suitable crystals were immediately mounted on single crystal X-ray diffractometer for structural determination. IR spectrum (see Fig. S4b).

### Determination of the Crystal Structures

The numerical absorption corrections were applied using the program of ABSCOR. The structures were solved using direct methods, which yielded the positions of all non-hydrogen atoms. These were refined first isotropically and then anisotropically. All the hydrogen atoms of the ligands were placed in calculated positions with fixed isotropic thermal parameters and included in the structure factor calculations in the final stage of full-matrix least-squares refinement. All calculations were performed using the SHELXTL system of computer programs. The unit cell volume included a large region of disordered solvent which could not be modelled as discrete atomic sites. Crystal data and structure refinement parameters are summarized in Tables S1.

**Tables S1.** Crystal data and structure refinement for all MOFs structures discussed in this work

| Identification code                            | HSTC-1                                                                                          | $\text{H}_2\text{O}_2$ @HSTC-1                                                                                           | HSTC-2                                                                 | Oxidized-HSTC-2                                                        | HSTC-1a                                                              |
|------------------------------------------------|-------------------------------------------------------------------------------------------------|--------------------------------------------------------------------------------------------------------------------------|------------------------------------------------------------------------|------------------------------------------------------------------------|----------------------------------------------------------------------|
| Empirical formula                              | $[\text{Zn}(\text{C}_5\text{H}_3\text{N}_4)(\text{CH}_3\text{COO})] \cdot \text{CH}_3\text{CN}$ | $[\text{Zn}(\text{C}_5\text{H}_3\text{N}_4)(\text{CH}_3\text{COO})] \cdot \text{H}_2\text{O}_2 \cdot \text{H}_2\text{O}$ | $[\text{Zn}(\text{C}_5\text{H}_3\text{N}_4)(\text{CH}_3\text{COO})]$   | $[\text{Zn}(\text{C}_5\text{H}_3\text{N}_4)(\text{CH}_3\text{COOOH})]$ | $[\text{ZnO}(\text{C}_5\text{H}_3\text{N}_4)]$                       |
| Formula weight                                 | 284.58                                                                                          | 295.56                                                                                                                   | 243.53                                                                 | 260.54                                                                 | 200.48                                                               |
| Temperature/K                                  | 299(2)                                                                                          | 301.06(10)                                                                                                               | 150.15                                                                 | 99.98(12)                                                              | 299.35(10)                                                           |
| Space group                                    | $P2_12_12_1$                                                                                    |                                                                                                                          | $I-4$                                                                  |                                                                        | $P2_1/c$                                                             |
| a/Å                                            | 9.69687(15)                                                                                     | 9.5293(3)                                                                                                                | 14.9679(2)                                                             | 15.0686(4)                                                             | 9.6930(4)                                                            |
| b/Å                                            | 9.74643(16)                                                                                     | 9.9206(3)                                                                                                                | 14.9679(2)                                                             | 15.0686(4)                                                             | 10.4834(3)                                                           |
| c/Å                                            | 11.43337(20)                                                                                    | 11.3847(5)                                                                                                               | 9.6787(2)                                                              | 9.6371(3)                                                              | 6.5421(2)                                                            |
| $\beta/^\circ$                                 | -                                                                                               | -                                                                                                                        | -                                                                      | -                                                                      | 105.143(4)                                                           |
| Volume/Å <sup>3</sup>                          | 1080.57(3)                                                                                      | 1076.27(7)                                                                                                               | 2168.40(7)                                                             | 2188.23(13)                                                            | 641.70(4)                                                            |
| Z                                              | 4                                                                                               | 4                                                                                                                        | 8                                                                      | 8                                                                      | 4                                                                    |
| $\rho_{\text{calc}}/\text{g}/\text{cm}^3$      | 1.749                                                                                           | 1.824                                                                                                                    | 1.492                                                                  | 1.582                                                                  | 2.075                                                                |
| $\mu/\text{mm}^{-1}$                           | 3.175                                                                                           | 3.396                                                                                                                    | 3.034                                                                  | 3.118                                                                  | 4.823                                                                |
| F(000)                                         | 576                                                                                             | 600.0                                                                                                                    | 976                                                                    | 1048.0                                                                 | 396.0                                                                |
| Wavelength/Å                                   | Cu $K_\alpha$ ( $\lambda = 1.54184$ )                                                           |                                                                                                                          |                                                                        |                                                                        |                                                                      |
| 2 $\theta$ range for data collection/ $^\circ$ | 11.932 to 145.314                                                                               | 11.832 to 157.83                                                                                                         | 8.354 to 133.014                                                       | 10.898 to 154.498                                                      | 9.452 to 146.586                                                     |
| Index ranges                                   | -11 $\leq h \leq$ 6,<br>-11 $\leq k \leq$ 11,<br>-13 $\leq l \leq$ 13                           | -8 $\leq h \leq$ 11,<br>-12 $\leq k \leq$ 10,<br>-13 $\leq l \leq$ 14                                                    | -17 $\leq h \leq$ 13,<br>-17 $\leq k \leq$ 17,<br>-11 $\leq l \leq$ 11 | -16 $\leq h \leq$ 19,<br>-18 $\leq k \leq$ 17, -11 $\leq l \leq$ 4     | -11 $\leq h \leq$ 12,<br>-12 $\leq k \leq$ 12,<br>-8 $\leq l \leq$ 7 |

|                                                |                                                                  |                                                                  |                                                                  |                                                                  |                                                             |
|------------------------------------------------|------------------------------------------------------------------|------------------------------------------------------------------|------------------------------------------------------------------|------------------------------------------------------------------|-------------------------------------------------------------|
| Reflections collected                          | 3089                                                             | 3730                                                             | 5185                                                             | 3159                                                             | 2306                                                        |
| Independent reflections                        | 1798 [ $R_{\text{int}} = 0.0172$ , $R_{\text{sigma}} = 0.0256$ ] | 1977 [ $R_{\text{int}} = 0.0305$ , $R_{\text{sigma}} = 0.0352$ ] | 1848 [ $R_{\text{int}} = 0.0223$ , $R_{\text{sigma}} = 0.0244$ ] | 1874 [ $R_{\text{int}} = 0.0218$ , $R_{\text{sigma}} = 0.0307$ ] | 2306 [ $R_{\text{int}} = ?$ , $R_{\text{sigma}} = 0.0181$ ] |
| Data/restraints/parameters                     | 1798/0/157                                                       | 1977/0/158                                                       | 1848/121/167                                                     | 1874/102/188                                                     | 2306/0/101                                                  |
| Goodness-of-fit on $F^2$                       | 1.104                                                            | 1.052                                                            | 1.055                                                            | 1.088                                                            | 1.149                                                       |
| Final R indexes [ $I > 2\sigma(I)$ ]           | $R_1 = 0.0249$ , $wR_2 = 0.0662$                                 | $R_1 = 0.0428$ , $wR_2 = 0.1184$                                 | $R_1 = 0.0482$ , $wR_2 = 0.1347$                                 | $R_1 = 0.0485$ , $wR_2 = 0.1378$                                 | $R_1 = 0.0299$ , $wR_2 = 0.0918$                            |
| Final R indexes [all data]                     | $R_1 = 0.0257$ , $wR_2 = 0.0668$                                 | $R_1 = 0.0451$ , $wR_2 = 0.1204$                                 | $R_1 = 0.0485$ , $wR_2 = 0.1351$                                 | $R_1 = 0.0503$ , $wR_2 = 0.1395$                                 | $R_1 = 0.0324$ , $wR_2 = 0.0936$                            |
| Largest diff. peak/hole / $e \text{ \AA}^{-3}$ | 0.39/-0.29                                                       | 1.39/-0.57                                                       | 0.65/-0.46                                                       | 0.69/-0.47                                                       | 0.77/-0.38                                                  |

$$^a R_1 = \sum(|F_o| - |F_c|) / \sum|F_o|; wR_2 = [\sum w(F_o^2 - F_c^2)^2 / \sum w(F_o^2)^2]^{1/2}$$

### Topological analysis:

Systre files for the net

CRYSTAL

NAME HSTC-1-#1

GROUP I4132

CELL 2.82843 2.82843 2.82843 90.0000 90.0000 90.0000

NODE 1 3 0.37500 0.37500 0.37500

EDGE 0.37500 0.37500 0.37500 0.12500 0.37500 0.62500

# EDGE\_CENTER 0.25000 0.37500 0.50000

END

1: HSTC-1-#1/Systre

#####

Topology for C1

-----

Atom C1 links by bridge ligands and has

Common vertex with

R(A-A)

|   |   |        |        |        |         |        |   |
|---|---|--------|--------|--------|---------|--------|---|
| C | 1 | 0.1250 | 0.3750 | 0.6250 | (0 0 1) | 1.000A | 1 |
| C | 1 | 0.6250 | 0.1250 | 0.3750 | (1 0 0) | 1.000A | 1 |
| C | 1 | 0.3750 | 0.6250 | 0.1250 | (0 1 0) | 1.000A | 1 |

-----

Structural group analysis

-----

-----

#### Structural group No 1

-----  
Structure consists of 3D framework with C  
Coordination sequences

-----  
C1: 1 2 3 4 5 6 7 8 9 10  
Num 3 6 12 24 35 48 69 86 108 138  
Cum 4 10 22 46 81 129 198 284 392 530  
-----

TD10=530

Vertex symbols for selected sublattice

-----  
C1 Point symbol:{10^3}  
Extended point symbol:[10(5).10(5).10(5)]  
-----

Point symbol for net: {10^3}  
3-c net; uninodal net

Topological type: srs; 3/10/c1 (topos&RCSR.ttd) {10^3} - VS [10(5).10(5).10(5)] (17888 types in 4  
databases)

Elapsed time: 7.16 sec.

HSTC-2-#1/Systre

#####

#### Topology for C1

-----  
Atom C1 links by bridge ligands and has

| Common vertex with |         |         |         |           | R(A-A) |   |
|--------------------|---------|---------|---------|-----------|--------|---|
| C 1                | -0.1250 | 0.0000  | 0.0000  | ( 0 0 0)  | 1.000A | 1 |
| C 1                | 0.2500  | 0.1250  | -0.2500 | ( 0 0 -1) | 1.000A | 1 |
| C 1                | 0.2500  | -0.1250 | 0.2500  | ( 0 -1 0) | 1.000A | 1 |

-----

Structural group analysis

#### Structural group No 1

-----  
Structure consists of 3D framework with C

Coordination sequences

-----  
C1: 1 2 3 4 5 6 7 8 9 10

Num 3 6 12 22 35 50 69 92 116 142  
 Cum 4 10 22 44 79 129 198 290 406 548

TD10=548

Vertex symbols for selected sublattice

C1 Point symbol:{8<sup>2</sup>.10}

Extended point symbol:[8.8.10(3)]

Point symbol for net: {8<sup>2</sup>.10}

3-c net; uninodal net

Topological type: lig; 3/8/t1; sqc978 (topos&RCSR.ttd) {8<sup>2</sup>.10} - VS [8.8.10(3)] (17888 types in 4 databases)

Elapsed time: 12.11 sec.

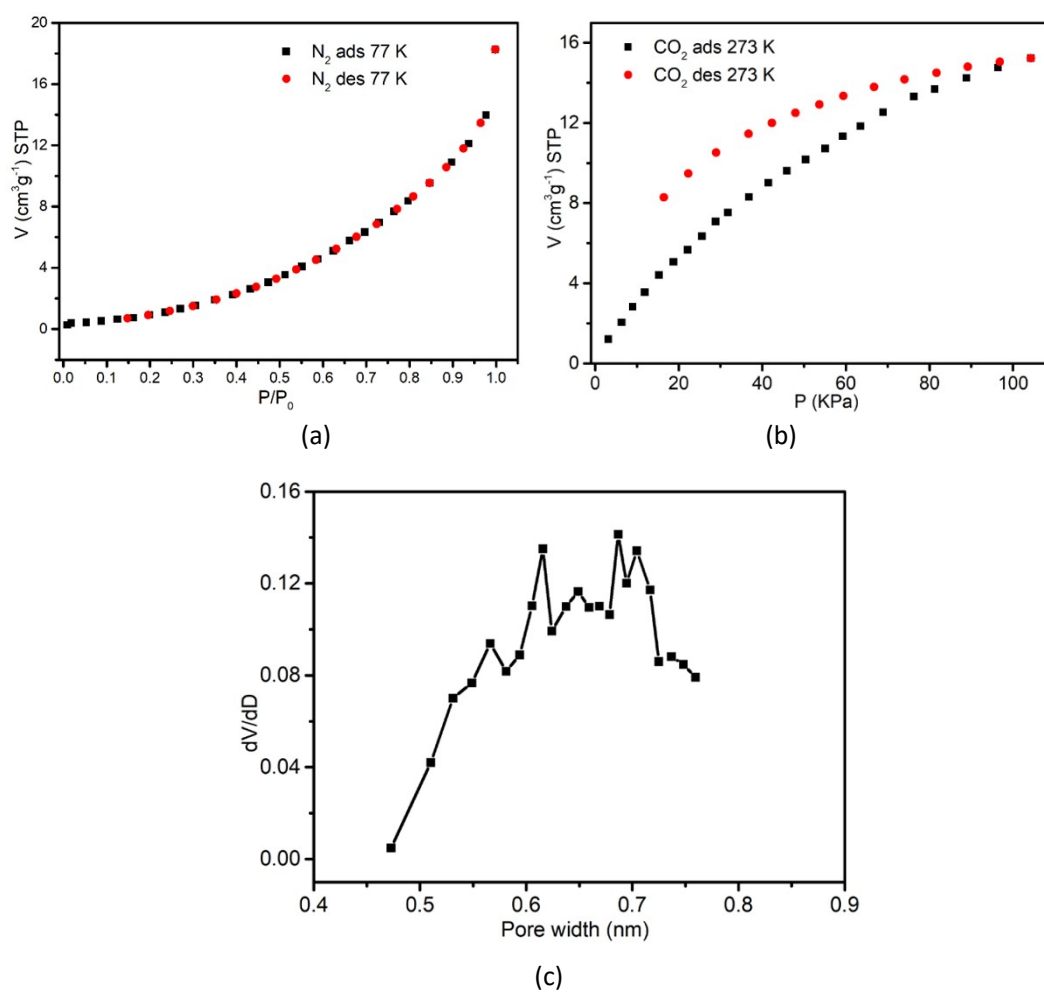

Fig. S1. (a) The  $N_2$  adsorption isotherms at 77 K and (b)  $CO_2$  adsorption isotherms at 273 K for HSTC-1. (c) HK porosity analysis of HSTC-1 by using the data of  $CO_2$  adsorption at 273 K.

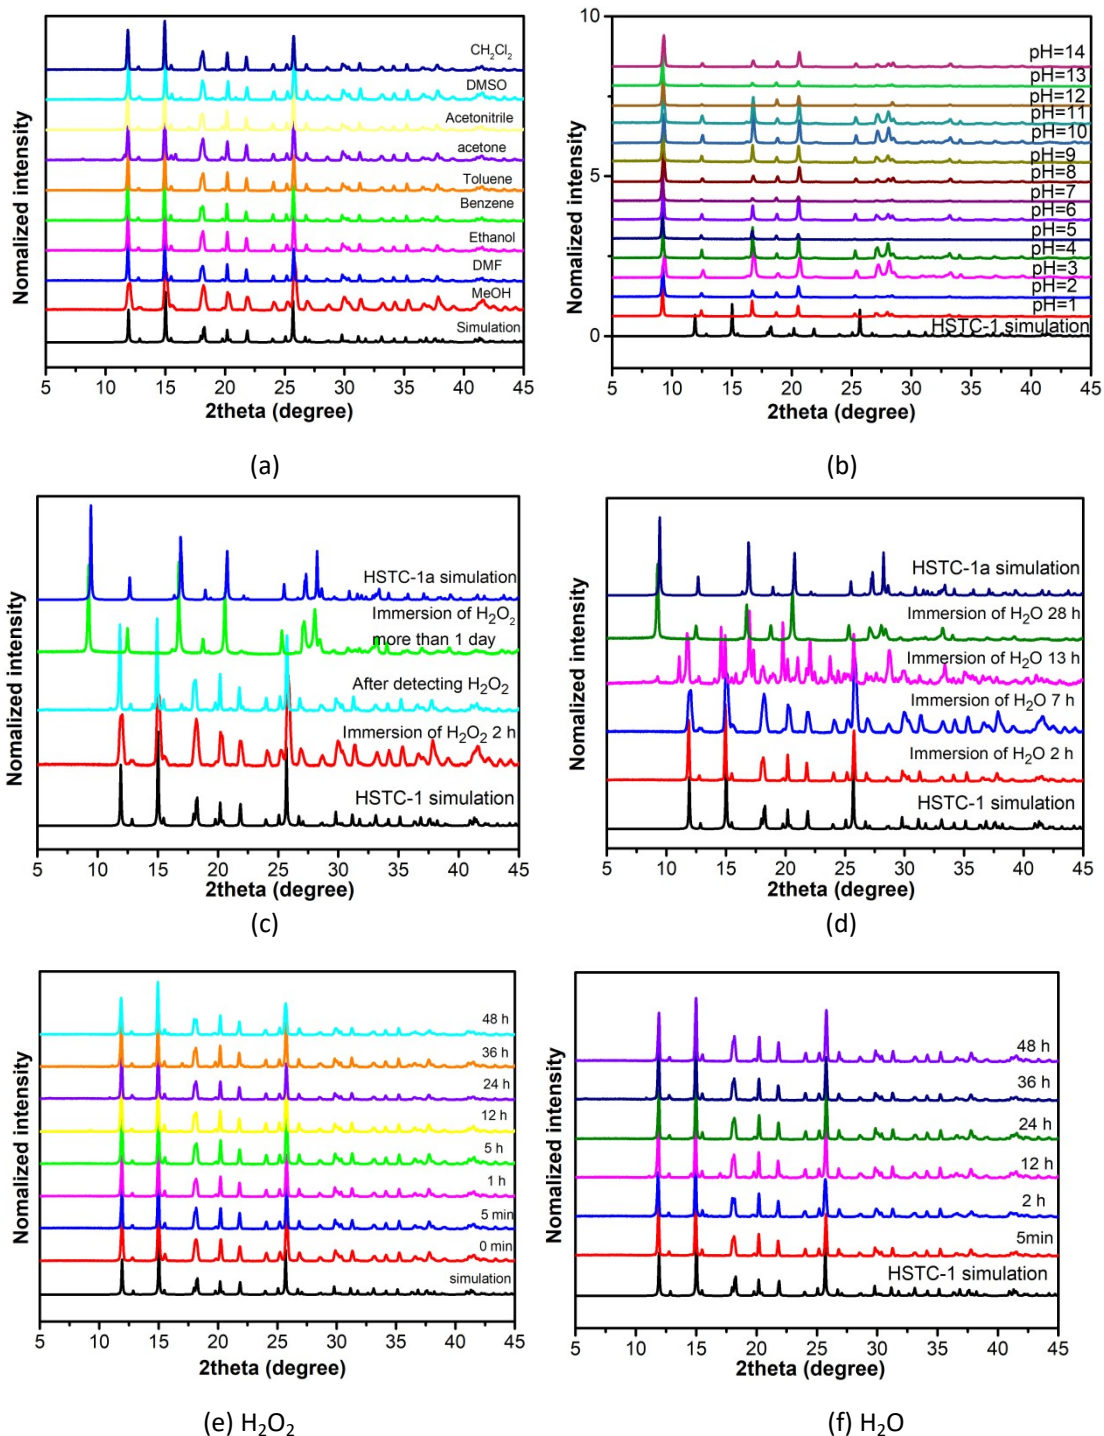

Fig. S2. (a) PXRD patterns of HSTC-1 soaked in different organic solvents. (b) PXRD patterns of HSTC-1 soaked in  $\text{H}_2\text{O}$  (pH=1-14) (c) Comparison of simulated PXRD patterns of HSTC-1, HSTC-1 being immersed in  $\text{H}_2\text{O}_2$  for 2 h and the PXRD patterns of HSTC-1 sample after detecting hydrogen peroxide. (d) PXRD patterns of HSTC-1 immersed in  $\text{H}_2\text{O}$  at different times. (e) In situ PXRD pattern of  $\text{H}_2\text{O}_2$  droplets on the HSTC-1 sample. (f) In situ PXRD pattern of  $\text{H}_2\text{O}$  droplets on the HSTC-1 sample.

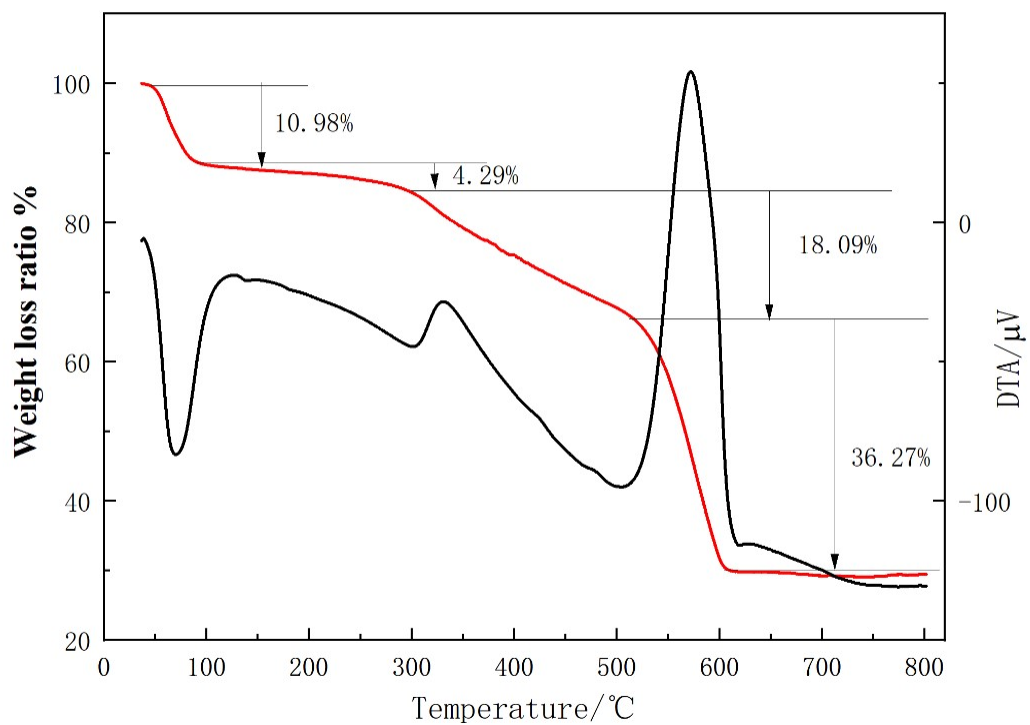

(a) HSTC-1

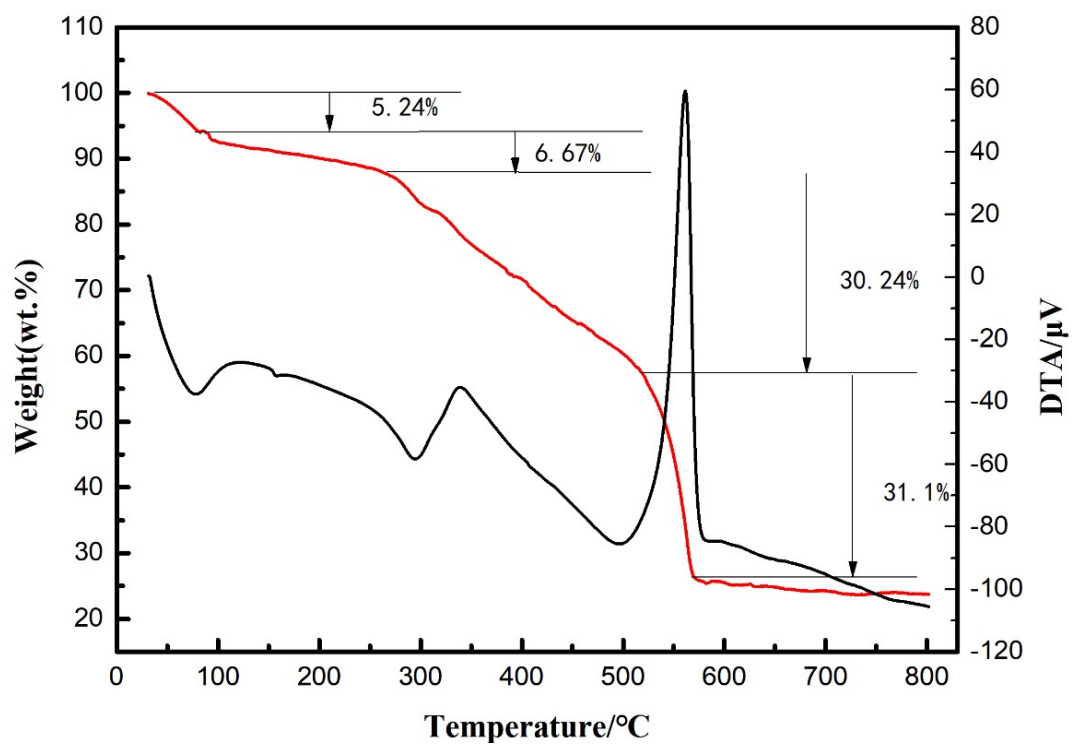

(b) HSTC-2

Fig. S3. Thermogravimetric analysis of (a) HSTC-1 and (b) HSTC-2.

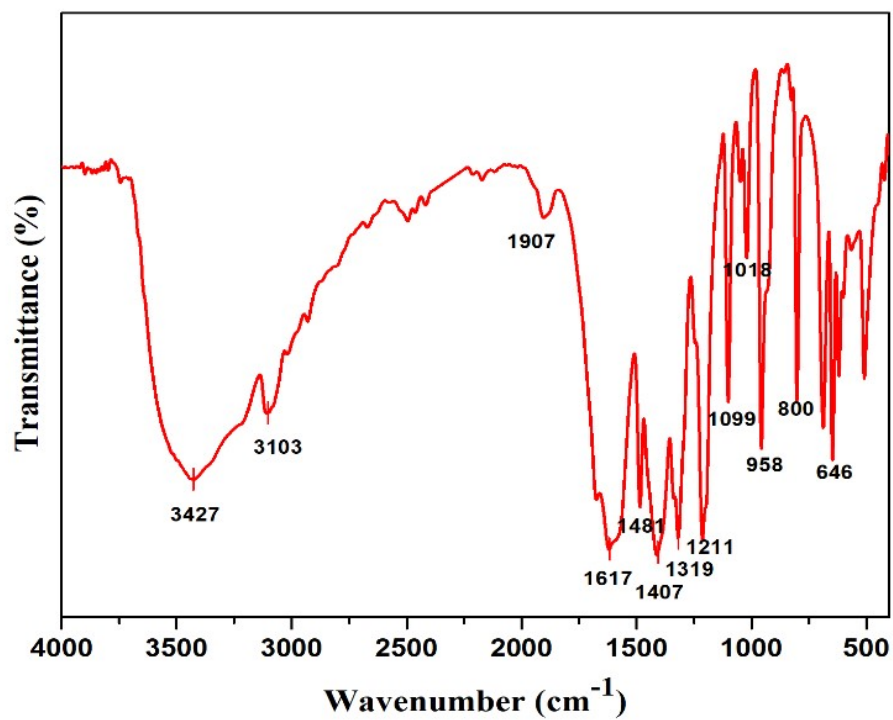

(a) HSTC-1

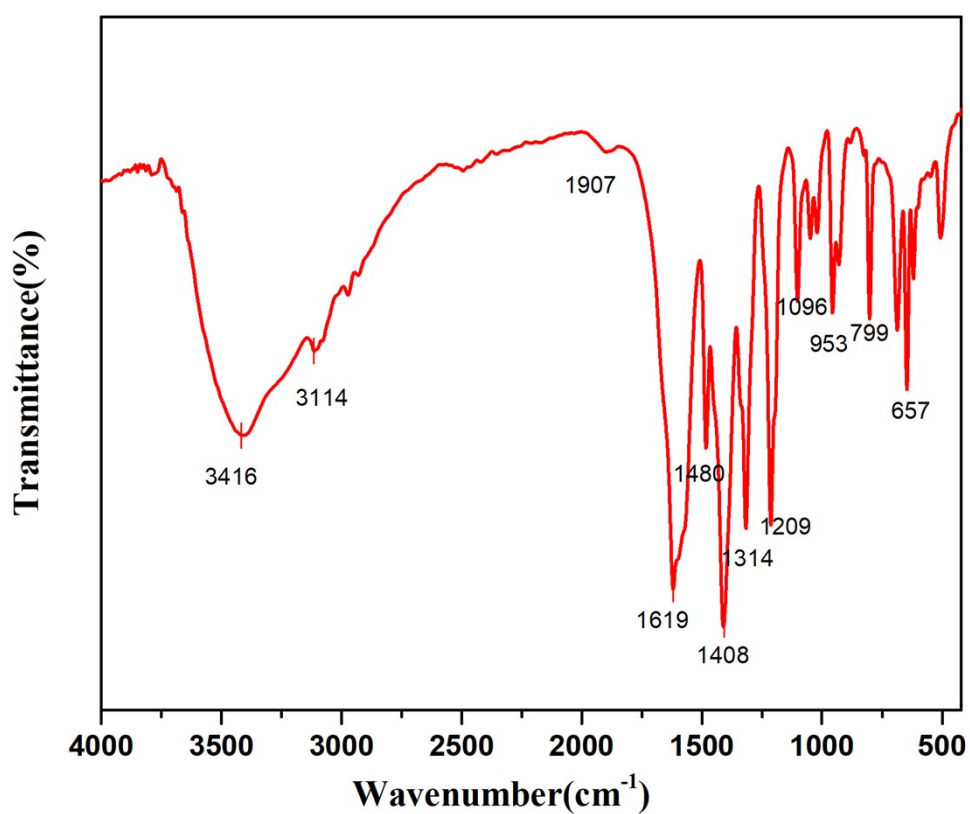

(b) HSTC-2

Fig. S4. The FTIR spectra of (a) HSTC-1 and (b) HSTC-2.

### Luminescence Properties Measurements

HSTC-1 acetonitrile suspension (3 mL) was placed in four-way cuvettes with the gradual addition of different concentrations  $\text{H}_2\text{O}_2$ , respectively. After dispersing evenly, the fluorescent intensity was recorded at 15 minutes intervals. It is noteworthy that each sample has 3 replicates.

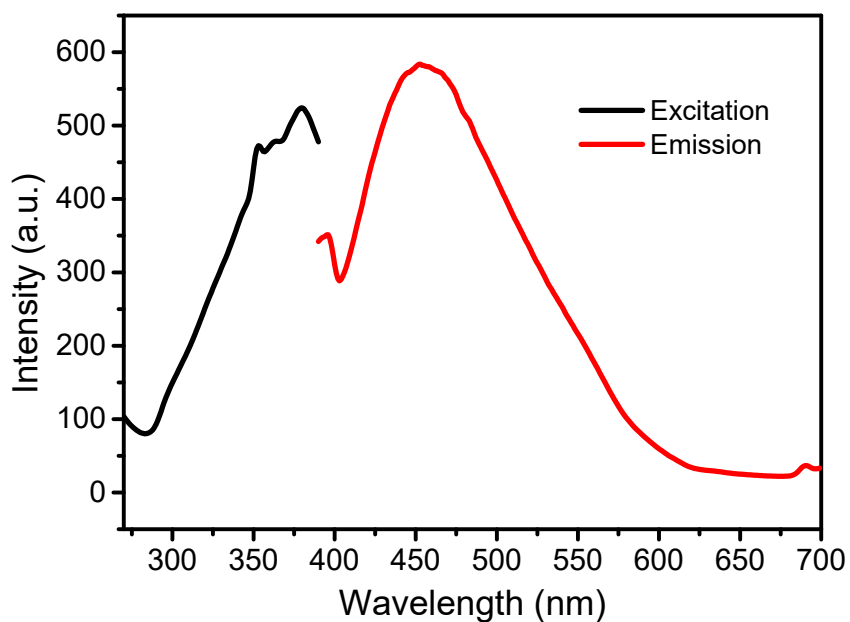

Fig. S5. The excitation and emission spectra of solid HSTC-1.

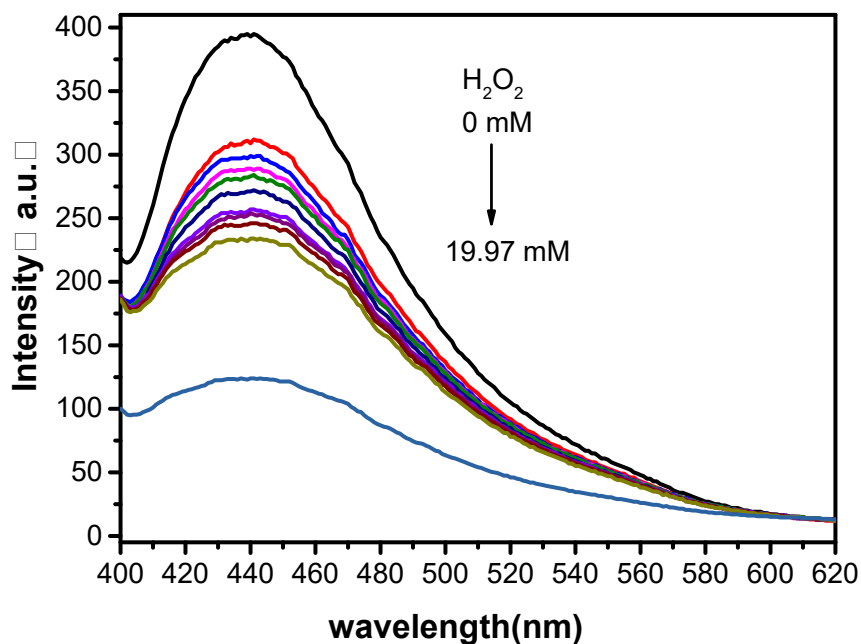

Fig. S6. Emission spectra of HSTC-1 acetonitrile suspension excited at 380 nm upon the incremental addition of  $\text{H}_2\text{O}_2$  in the range of 0 – 20 mM. The bottom dark blue line is the addition of  $\text{H}_2\text{O}_2$  to a cumulative concentration of 100 mM.

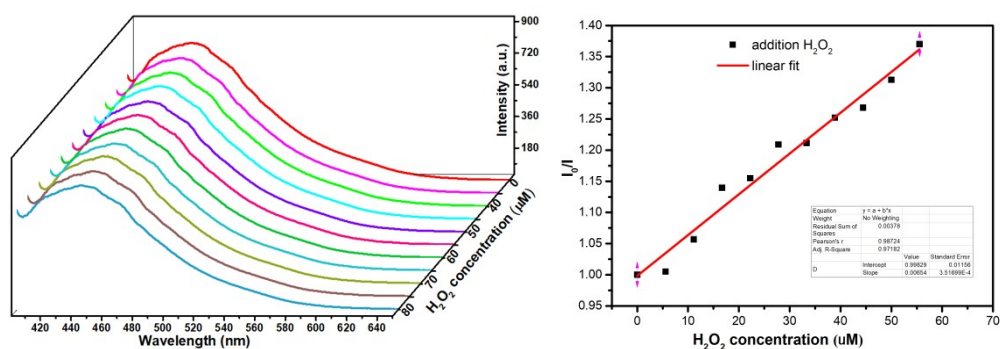

Fig. S7. Emission spectra of HSTC-1 acetonitrile suspension excited at 380 nm upon the incremental addition of H<sub>2</sub>O<sub>2</sub> with a Stern-Volmer equation of  $I_0/I = 0.9983 - 0.00654x$  ( $R^2 = 0.9718$ ) in the range of 0-80 μM ( $I_0$  = luminescence intensity of pristine HSTC-1,  $I$  = luminescence intensity of HSTC-1 after addition of H<sub>2</sub>O<sub>2</sub>).

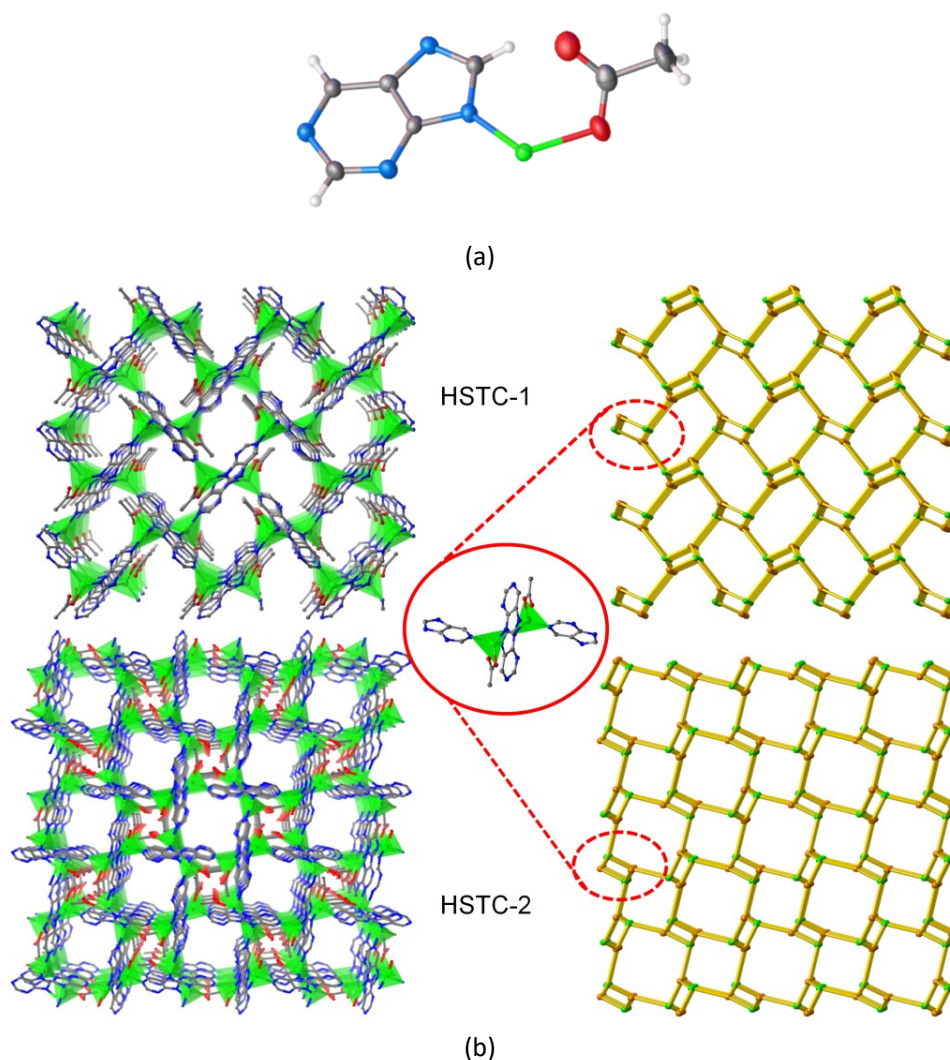

Fig. S8. (a) Asymmetric unit of HSTC-2. (b) The 3D structure framework and topological type of HSTC-1 and HSTC-2.

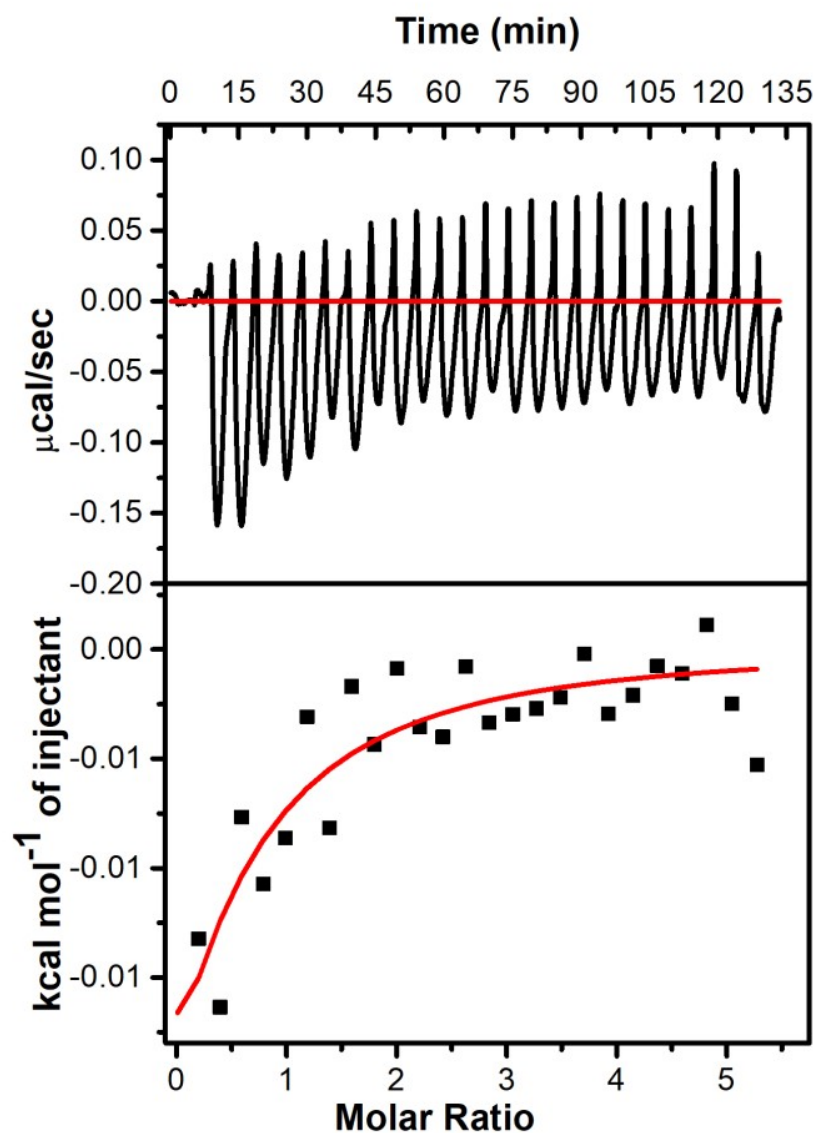

Fig. S9. ITC thermogram from titration of a HSTC-1 suspension (4 mM, 1.8 mL) with H<sub>2</sub>O (15  $\mu\text{L}$  each injection) and the low fitting with a single site model. No significant thermal changes were observed in the thermogram and thermodynamic parameters could not be obtained.

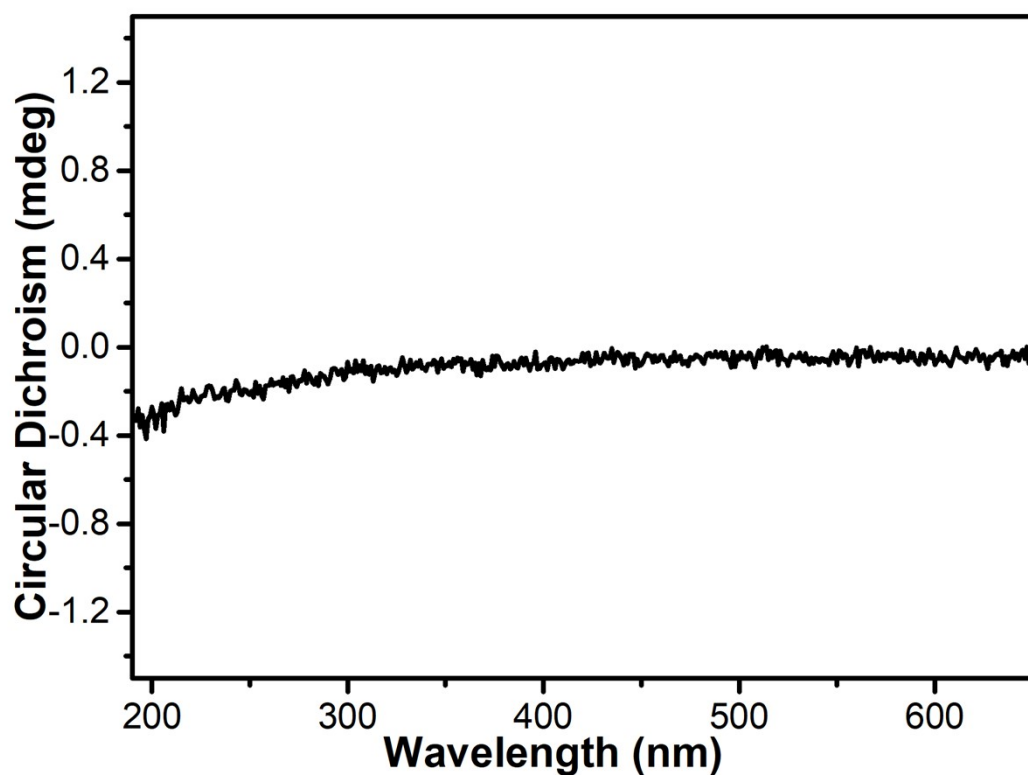

(a)

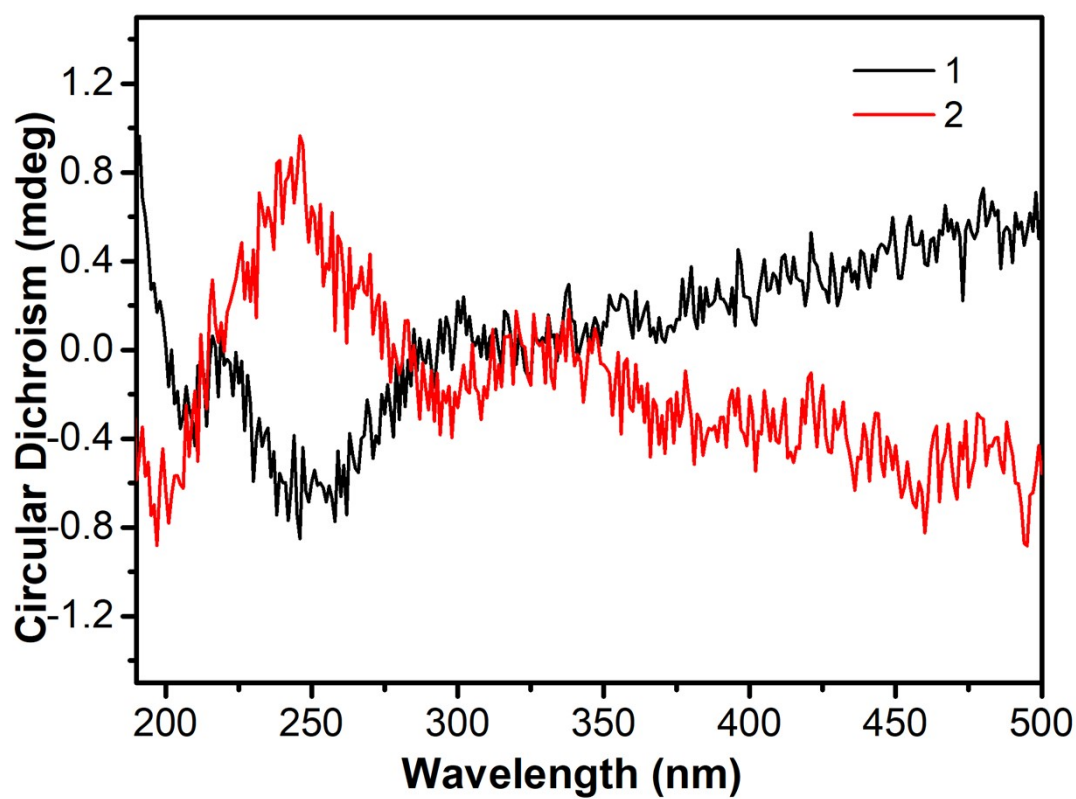

(b)

Fig. S10. Solid-state CD spectra of HSTC-1 measured using (a) bulk sample and (b) two different chiral single crystals, tableted, and diluted by KCl.

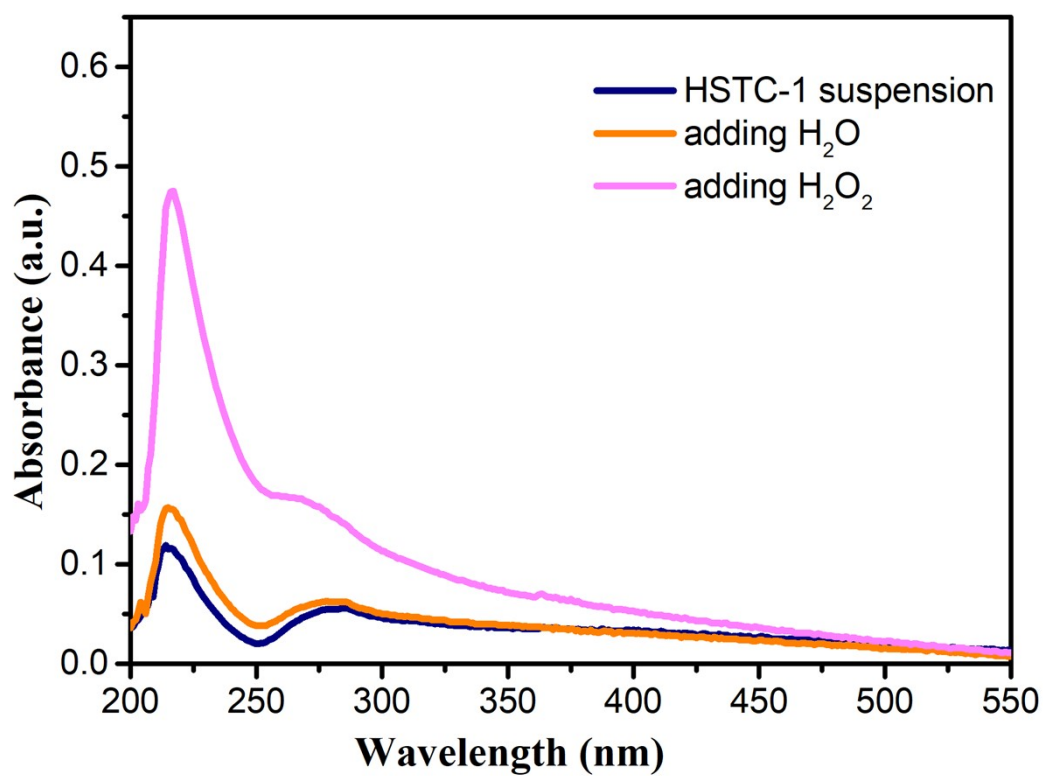

(a)

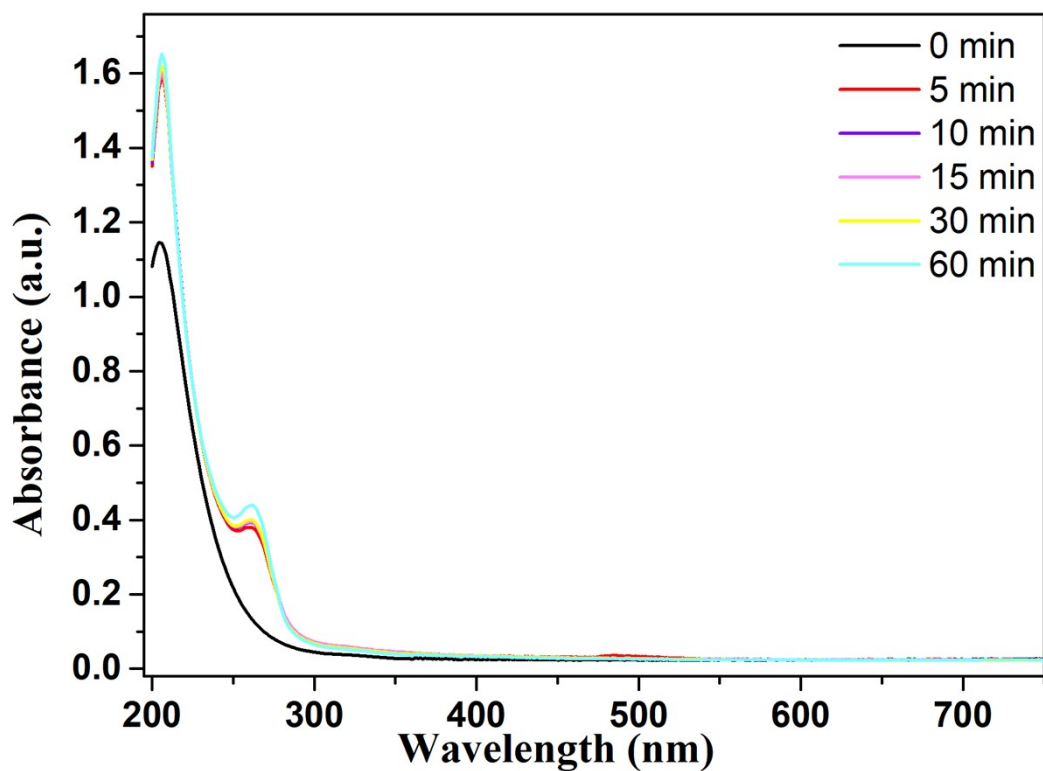

(b)

Fig. S11. (a) UV-Vis absorption spectra of the addition of  $\text{H}_2\text{O}$  and  $\text{H}_2\text{O}_2$  in HSTC-1 acetonitrile suspension. (b) Time-dependent monitoring of the UV-Vis absorption spectra of  $\text{H}_2\text{O}_2$  solution added to HSTC-1 crystals.

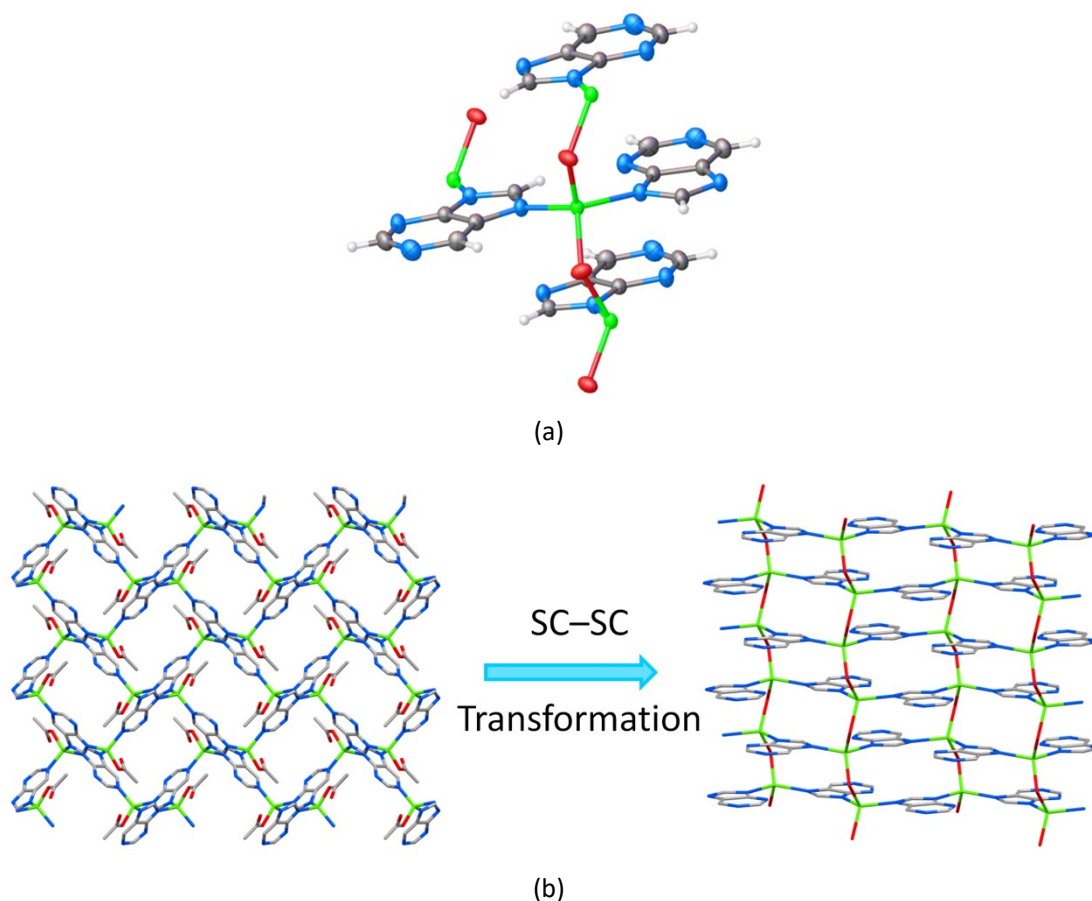

Fig. S12. (a) The coordination environment of HSTC-1 after soaking in  $\text{H}_2\text{O}_2$  for more than 1 day. (b) Crystallization transformation of HSTC-1 from three-dimensional framework to two-dimensional framework.

**Table S2.** Binding energies (unit: kcal/mol) for host-guest interactions between  $\text{H}_2\text{O}_2$  molecules and HSTC-1 or HSTC-2.

| No. of H <sub>2</sub> O <sub>2</sub> molecules | Binding energies of different equilibrium structures |        |        |        |        | Average binding energy |
|------------------------------------------------|------------------------------------------------------|--------|--------|--------|--------|------------------------|
| HSTC-1                                         |                                                      |        |        |        |        |                        |
| 1                                              | -8.86                                                | -6.13  | -8.55  | -3.25  | -      | -6.70 ± 2.61           |
| 2                                              | -20.24                                               | -14.00 | -17.78 | -17.17 | -17.38 | -17.31 ± 2.22          |
| 3                                              | -23.26                                               | -22.69 | -17.21 | -19.58 | -22.52 | -21.05 ± 2.58          |
| 4                                              | -29.25                                               | -21.75 | -21.46 | -27.55 | -22.76 | -24.55 ± 3.59          |
| 5                                              | -48.11                                               | -42.55 | -39.71 | -34.04 | -19.21 | -36.72 ± 11.03         |
| 6                                              | -28.53                                               | -33.83 | -49.63 | -40.64 | -30.72 | -36.67 ± 8.57          |
| HSTC-2                                         |                                                      |        |        |        |        |                        |
| 1                                              | -6.91                                                | -9.43  | -8.71  | -8.01  | -6.76  | -7.96 ± 1.15           |
| 2                                              | -16.36                                               | -13.60 | -16.07 | -17.54 | -18.20 | -16.35 ± 1.77          |
| 3                                              | -16.41                                               | -6.82  | -19.87 | -10.83 | -18.45 | -14.48 ± 5.49          |
| 4                                              | -30.36                                               | -20.14 | -20.03 | -19.83 | -27.46 | -23.56 ± 4.99          |
| 5                                              | -29.14                                               | -30.70 | -31.73 | -29.16 | -27.80 | -29.71 ± 1.53          |
| 6                                              | -33.41                                               | -33.95 | -35.69 | -22.79 | -26.06 | -30.38 ± 5.62          |

**Tables S3.** Binding energies (unit: kcal/mol) for guest-guest' interactions between H<sub>2</sub>O<sub>2</sub> molecules in HSTC-1 or HSTC-2.

| No. of H <sub>2</sub> O <sub>2</sub> molecules | Binding energies of different equilibrium structures |        |        |        |        | Average binding energy |
|------------------------------------------------|------------------------------------------------------|--------|--------|--------|--------|------------------------|
| HSTC-1                                         |                                                      |        |        |        |        |                        |
| 2                                              | -1.32                                                | -0.03  | -1.44  | -1.81  | 0.00   | -0.92 ± 0.85           |
| 3                                              | -3.38                                                | -1.68  | -5.87  | -2.40  | -2.26  | -3.12 ± 1.66           |
| 4                                              | -7.98                                                | -7.02  | -6.45  | -3.86  | -7.93  | -6.65 ± 1.69           |
| 5                                              | -12.26                                               | -12.22 | -15.07 | -11.36 | -9.12  | -12.01 ± 2.14          |
| 6                                              | -13.03                                               | -13.55 | -8.54  | -11.84 | -13.56 | -12.10 ± 2.11          |
| HSTC-2                                         |                                                      |        |        |        |        |                        |
| 2                                              | 0.00                                                 | 0.00   | 0.00   | 0.00   | 0.00   | 0.00 ± 0.00            |
| 3                                              | 0.65                                                 | -2.86  | -2.29  | -2.41  | -1.34  | -1.65 ± 1.40           |
| 4                                              | -5.22                                                | -5.92  | -3.44  | -5.45  | -5.07  | -5.02 ± 0.94           |
| 5                                              | -5.92                                                | -5.48  | -5.06  | -4.27  | -3.96  | -4.94 ± 0.82           |
| 6                                              | -13.41                                               | -7.47  | -5.48  | -4.03  | -1.93  | -6.46 ± 4.38           |
